# Supplementary material for: Recognition of Aedes aegypti Mosquito Saliva Protein LTRIN by the Human Receptor LTβR for Controlling the Immune Response
Source: MDPI journal article supplement (doi:10.3390/biology13010042), 2024-01-12
Supplement: s1 [file s1]

# Supplementary Figure

**a**

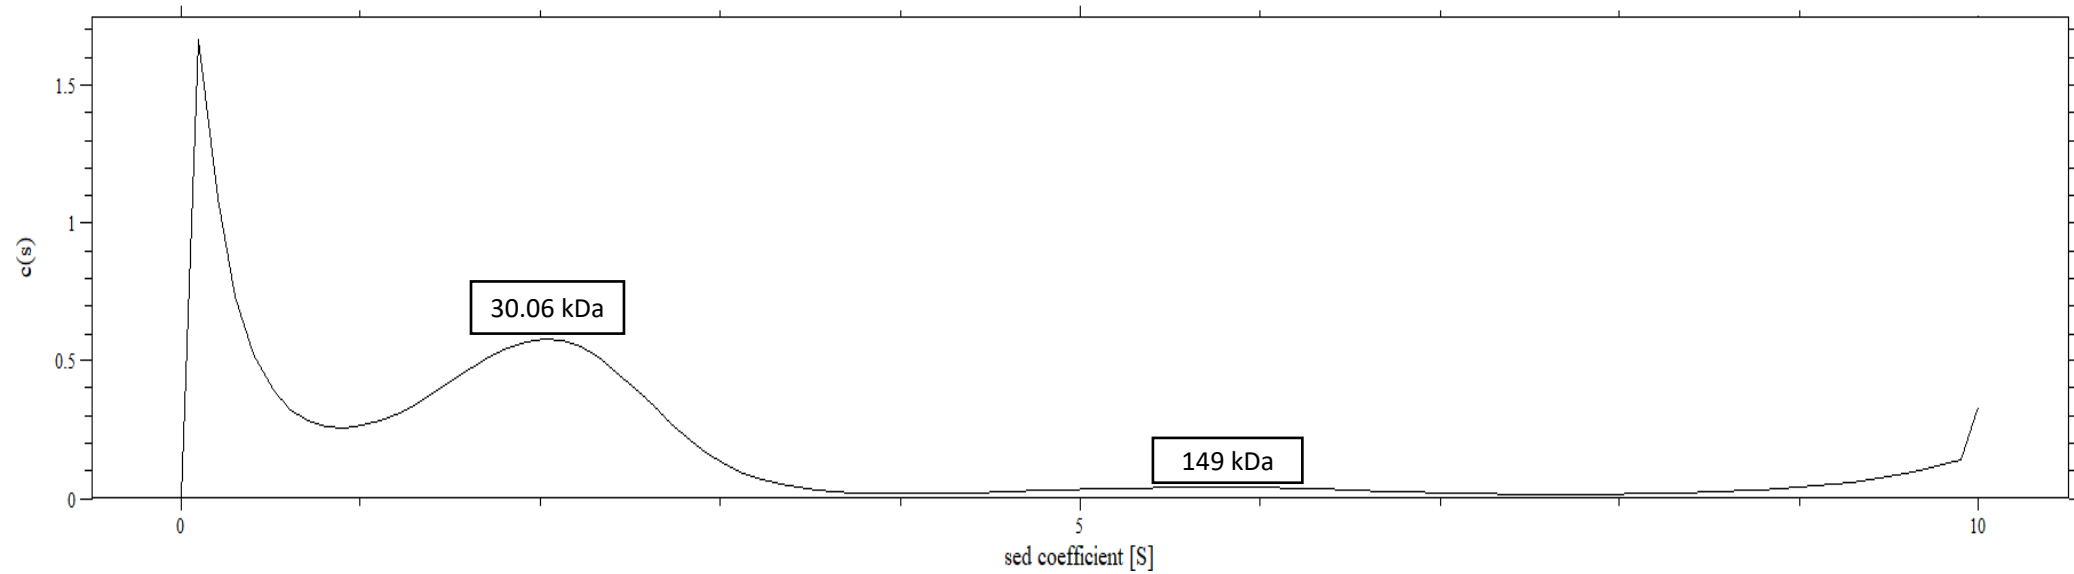

**Supplementary Figure S1:** a) Sedimentation equilibrium analysis of  $\Delta$ LTRIN indicates that it exist in dimer formation. b) Dynamic light scattering data (DLS) of  $\Delta$ LTRIN across different concentration. c) Size exclusion chromatography elution profile and SDS-PAGE of  $\Delta$ LTRIN in the presence of  $\text{Ca}^{2+}$  or EGTA. d) Comparing the DLS data of  $\Delta$ LTRIN in the presence of  $\text{Ca}^{2+}$  or EGTA. e) Size exclusion chromatography elution profile and SDS-PAGE C133Q  $\Delta$ LTRIN. f) DLS data of C133Q  $\Delta$ LTRIN showing that it is in dimer form. g) The CD spectra of  $\Delta$ LTRIN in the presence of 10mM EGTA continue to exhibit a predominant alpha helix secondary structure. h) Secondary structure prediction of full length LTRIN by PSIPRED. The signal peptide is highlighted in red box. The  $\Delta$ LTRIN used is underlined with green.

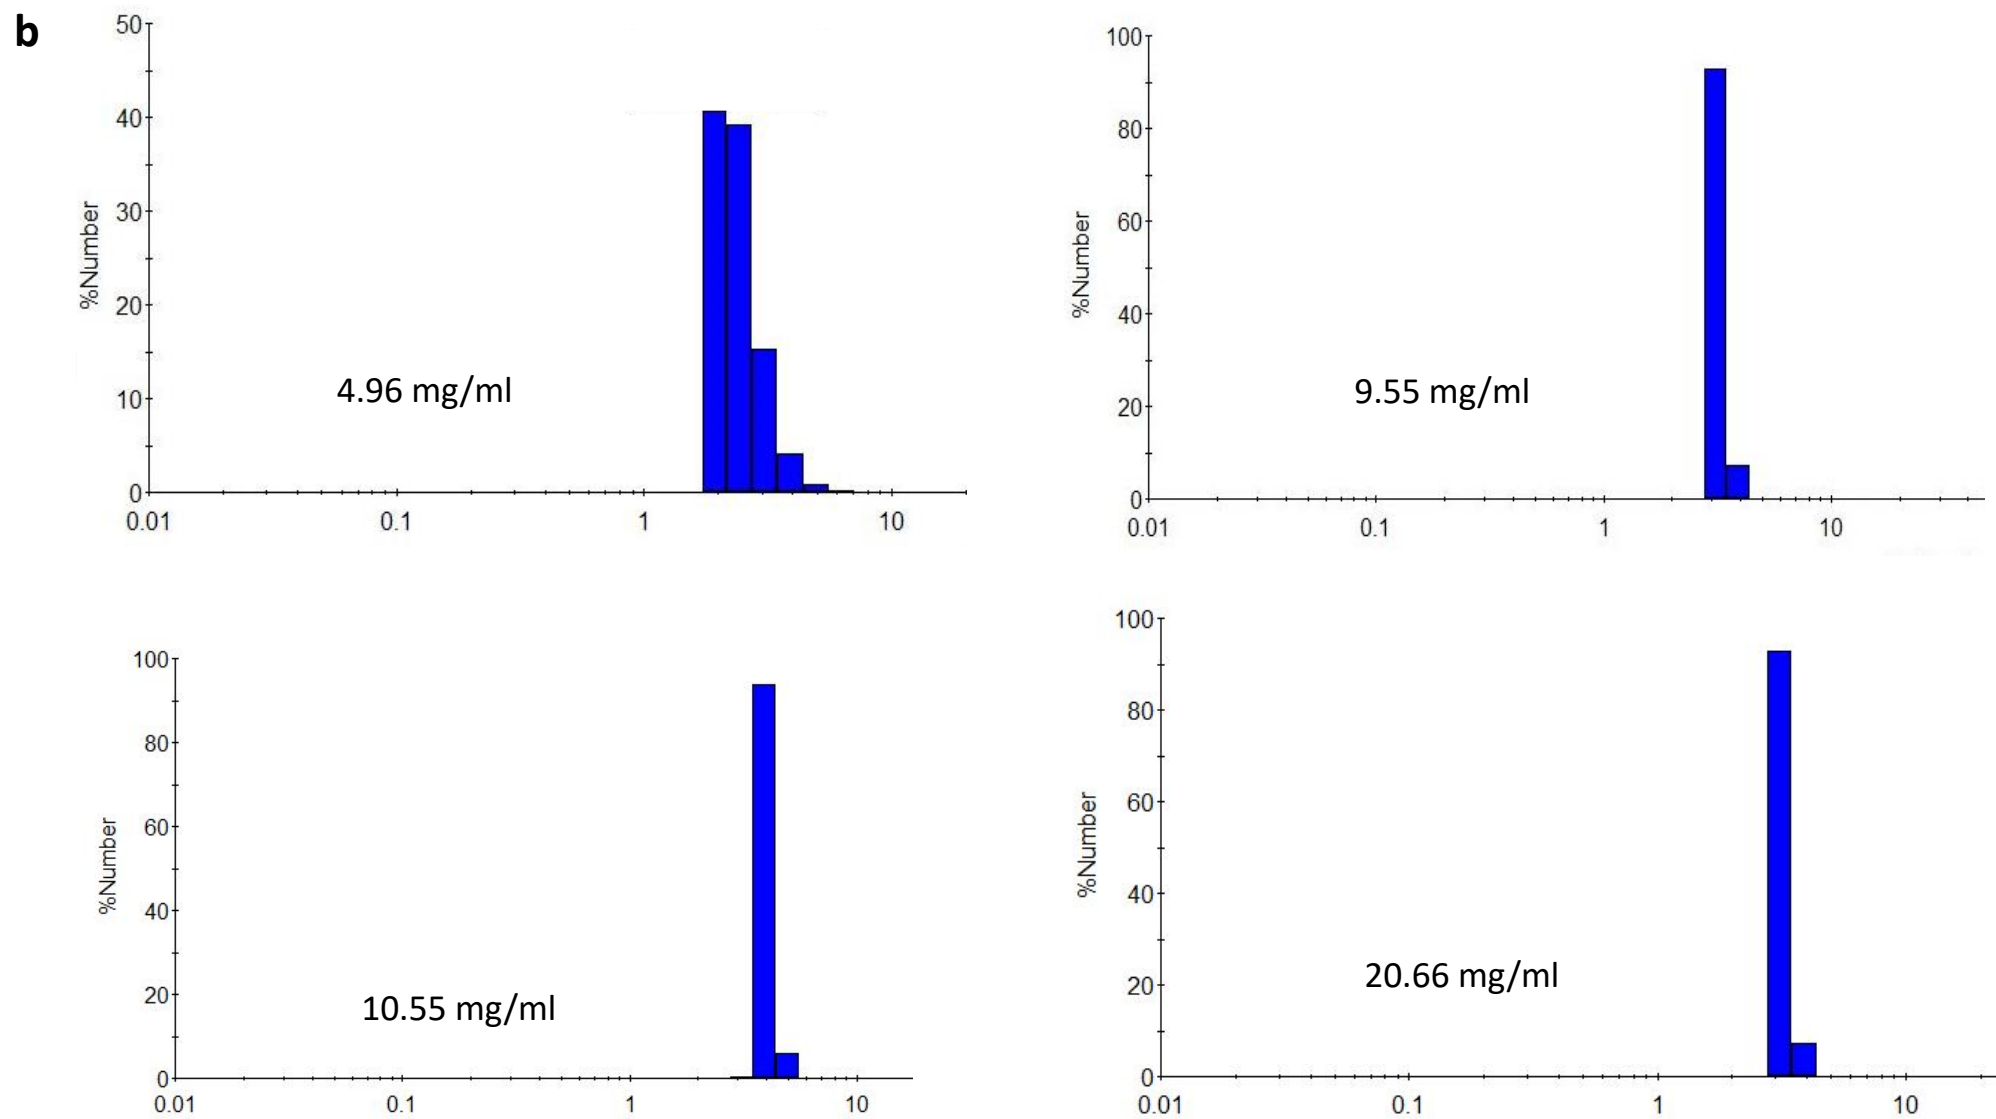

**Supplementary Figure S1:** a) Sedimentation equilibrium analysis of  $\Delta$ LTRIN indicates that it exist in dimer formation. b) Dynamic light scattering data (DLS) of  $\Delta$ LTRIN across different concentration. c) Size exclusion chromatography elution profile and SDS-PAGE of  $\Delta$ LTRIN in the presence of  $\text{Ca}^{2+}$  or EGTA. d) Comparing the DLS data of  $\Delta$ LTRIN in the presence of  $\text{Ca}^{2+}$  or EGTA. e) Size exclusion chromatography elution profile and SDS-PAGE C133Q  $\Delta$ LTRIN. f) DLS data of C133Q  $\Delta$ LTRIN showing that it is in dimer form. g) The CD spectra of  $\Delta$ LTRIN in the presence of 10mM EGTA continue to exhibit a predominant alpha helix secondary structure. h) Secondary structure prediction of full length LTRIN by PSIPRED. The signal peptide is highlighted in red box. The  $\Delta$ LTRIN used is underlined with green.

**c**

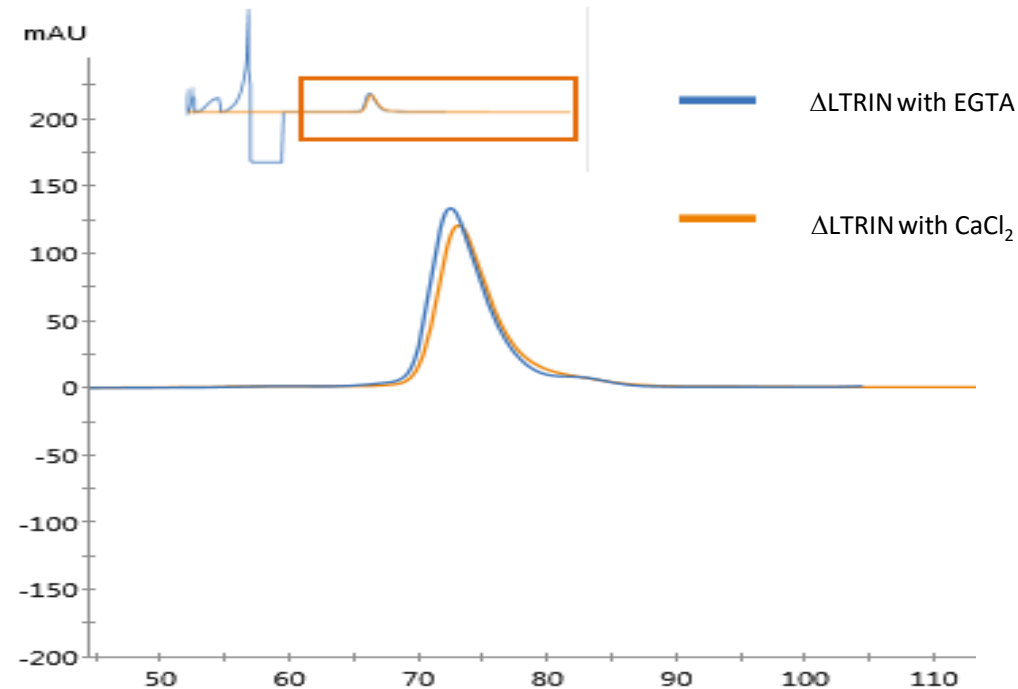

**Supplementary Figure S1:** a) Sedimentation equilibrium analysis of  $\Delta$ LTRIN indicates that it exist in dimer formation. b) Dynamic light scattering data (DLS) of  $\Delta$ LTRIN across different concentration. c) Size exclusion chromatography elution profile and SDS-PAGE of  $\Delta$ LTRIN in the presence of  $\text{Ca}^{2+}$  or EGTA. d) Comparing the DLS data of  $\Delta$ LTRIN in the presence of  $\text{Ca}^{2+}$  or EGTA. e) Size exclusion chromatography elution profile and SDS-PAGE C133Q  $\Delta$ LTRIN. f) DLS data of C133Q  $\Delta$ LTRIN showing that it is in dimer form. g) The CD spectra of  $\Delta$ LTRIN in the presence of 10mM EGTA continue to exhibit a predominant alpha helix secondary structure. h) Secondary structure prediction of full length LTRIN by PSIPRED. The signal peptide is highlighted in red box. The  $\Delta$ LTRIN used is underlined with green.

**d**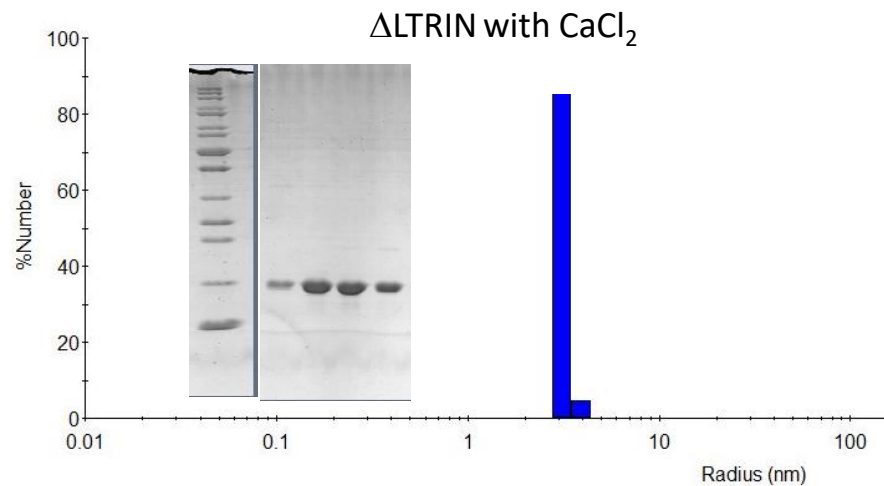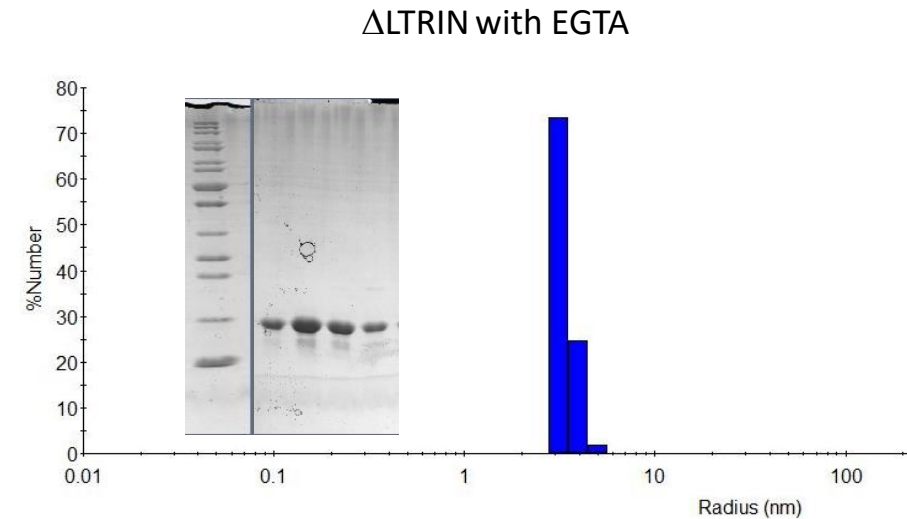

**Supplementary Figure S1:** a) Sedimentation equilibrium analysis of  $\Delta$ LTRIN indicates that it exist in dimer formation. b) Dynamic light scattering data (DLS) of  $\Delta$ LTRIN across different concentration. c) Size exclusion chromatography elution profile and SDS-PAGE of  $\Delta$ LTRIN in the presence of  $\text{Ca}^{2+}$  or EGTA. d) Comparing the DLS data of  $\Delta$ LTRIN in the presence of  $\text{Ca}^{2+}$  or EGTA. e) Size exclusion chromatography elution profile and SDS-PAGE C133Q  $\Delta$ LTRIN. f) DLS data of C133Q  $\Delta$ LTRIN showing that it is in dimer form. g) The CD spectra of  $\Delta$ LTRIN in the presence of 10mM EGTA continue to exhibit a predominant alpha helix secondary structure. h) Secondary structure prediction of full length LTRIN by PSIPRED. The signal peptide is highlighted in red box. The  $\Delta$ LTRIN used is underlined with green.

**e**

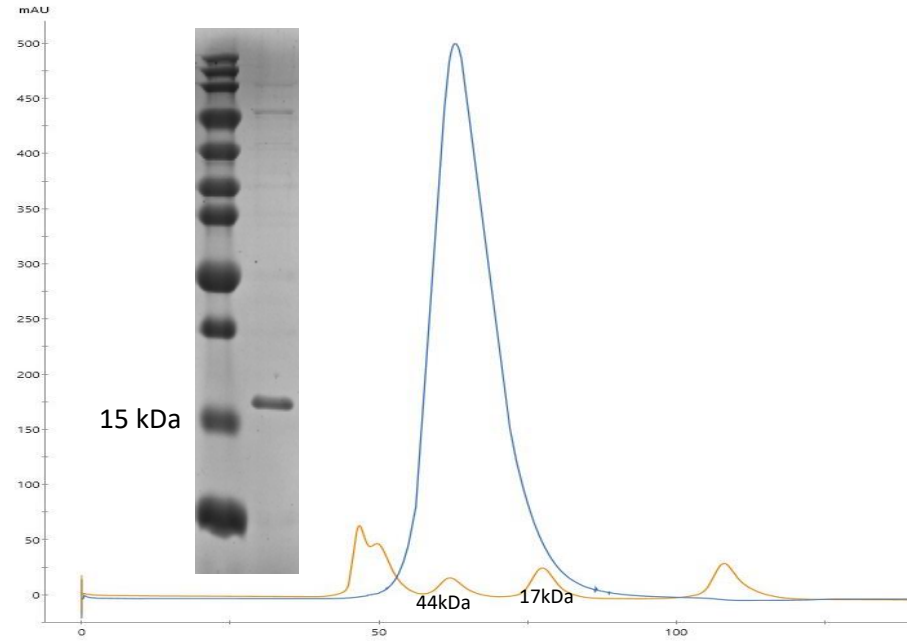

**Supplementary Figure S1:** a) Sedimentation equilibrium analysis of  $\Delta$ LTRIN indicates that it exist in dimer formation. b) Dynamic light scattering data (DLS) of  $\Delta$ LTRIN across different concentration. c) Size exclusion chromatography elution profile and SDS-PAGE of  $\Delta$ LTRIN in the presence of  $\text{Ca}^{2+}$  or EGTA. d) Comparing the DLS data of  $\Delta$ LTRIN in the presence of  $\text{Ca}^{2+}$  or EGTA. e) Size exclusion chromatography elution profile and SDS-PAGE C133Q  $\Delta$ LTRIN. f) DLS data of C133Q  $\Delta$ LTRIN showing that it is in dimer form. g) The CD spectra of  $\Delta$ LTRIN in the presence of 10mM EGTA continue to exhibit a predominant alpha helix secondary structure. h) Secondary structure prediction of full length LTRIN by PSIPRED. The signal peptide is highlighted in red box. The  $\Delta$ LTRIN used is underlined with green.

**f**

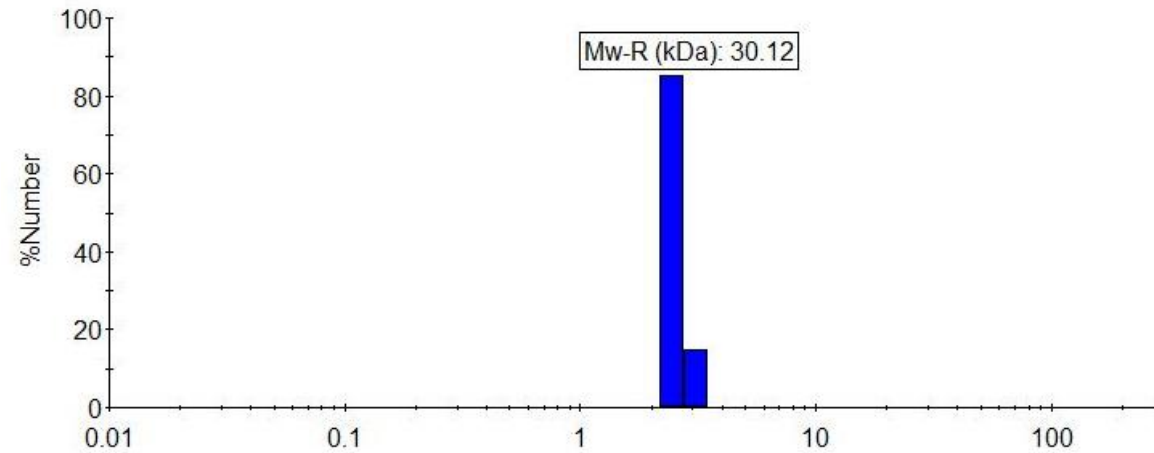

**Supplementary Figure S1:** a) Sedimentation equilibrium analysis of  $\Delta$ LTRIN indicates that it exist in dimer formation. b) Dynamic light scattering data (DLS) of  $\Delta$ LTRIN across different concentration. c) Size exclusion chromatography elution profile and SDS-PAGE of  $\Delta$ LTRIN in the presence of  $\text{Ca}^{2+}$  or EGTA. d) Comparing the DLS data of  $\Delta$ LTRIN in the presence of  $\text{Ca}^{2+}$  or EGTA. e) Size exclusion chromatography elution profile and SDS-PAGE C133Q  $\Delta$ LTRIN. f) DLS data of C133Q  $\Delta$ LTRIN showing that it is in dimer form. g) The CD spectra of  $\Delta$ LTRIN in the presence of 10mM EGTA continue to exhibit a predominant alpha helix secondary structure. h) Secondary structure prediction of full length LTRIN by PSIPRED. The signal peptide is highlighted in red box. The  $\Delta$ LTRIN used is underlined with green.

g

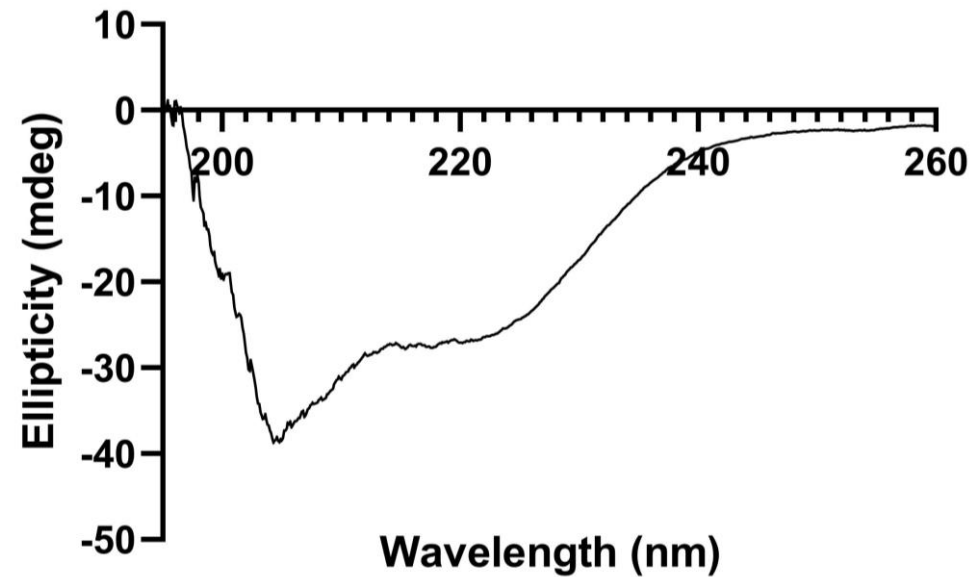

**Supplementary Figure S1:** a) Sedimentation equilibrium analysis of  $\Delta$ LTRIN indicates that it exist in dimer formation. b) Dynamic light scattering data (DLS) of  $\Delta$ LTRIN across different concentration. c) Size exclusion chromatography elution profile and SDS-PAGE of  $\Delta$ LTRIN in the presence of  $\text{Ca}^{2+}$  or EGTA. d) Comparing the DLS data of  $\Delta$ LTRIN in the presence of  $\text{Ca}^{2+}$  or EGTA. e) Size exclusion chromatography elution profile and SDS-PAGE C133Q  $\Delta$ LTRIN. f) DLS data of C133Q  $\Delta$ LTRIN showing that it is in dimer form. g) The CD spectra of  $\Delta$ LTRIN in the presence of 10mM EGTA continue to exhibit a predominant alpha helix secondary structure. h) Secondary structure prediction of full length LTRIN by PSIPRED. The signal peptide is highlighted in red box. The  $\Delta$ LTRIN used is underlined with green.



# h

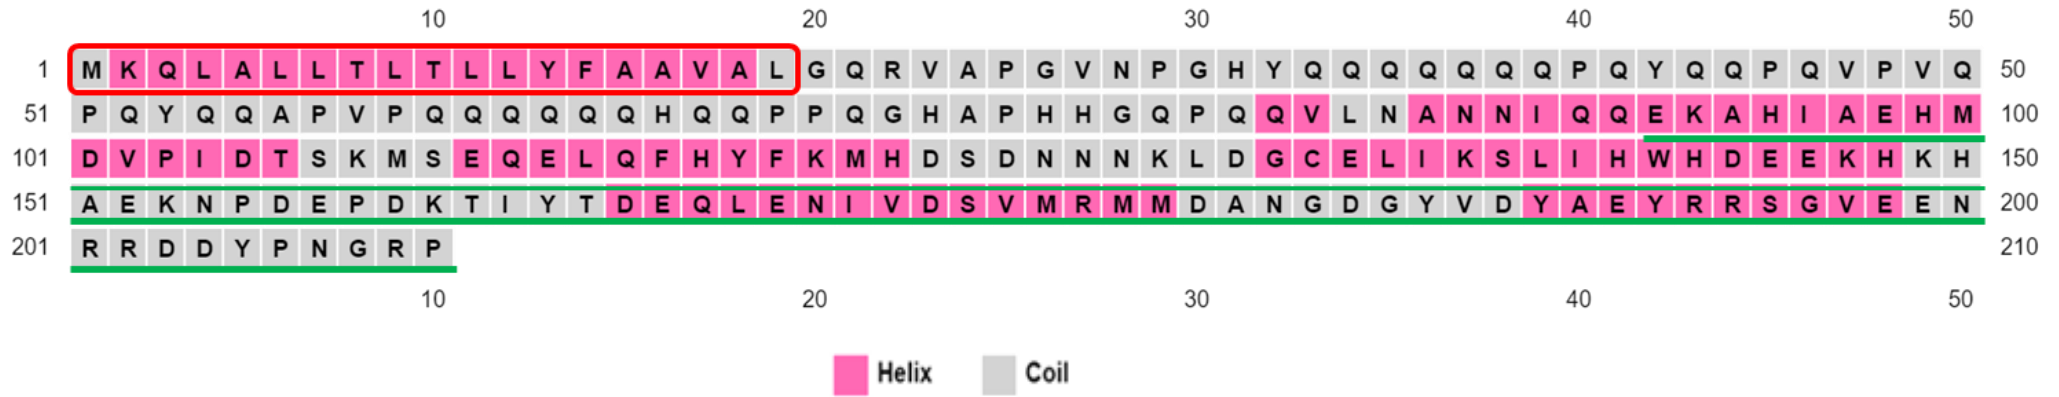

**Supplementary Figure S1:** a) Sedimentation equilibrium analysis of  $\Delta$ LTRIN indicates that it exist in dimer formation. b) Dynamic light scattering data (DLS) of  $\Delta$ LTRIN across different concentration. c) Size exclusion chromatography elution profile and SDS-PAGE of  $\Delta$ LTRIN in the presence of  $\text{Ca}^{2+}$  or EGTA. d) Comparing the DLS data of  $\Delta$ LTRIN in the presence of  $\text{Ca}^{2+}$  or EGTA. e) Size exclusion chromatography elution profile and SDS-PAGE C133Q  $\Delta$ LTRIN. f) DLS data of C133Q  $\Delta$ LTRIN showing that it is in dimer form. g) The CD spectra of  $\Delta$ LTRIN in the presence of 10mM EGTA continue to exhibit a predominant alpha helix secondary structure. h) Secondary structure prediction of full length LTRIN by PSIPRED. The signal peptide is highlighted in red box. The  $\Delta$ LTRIN used is underlined with green.

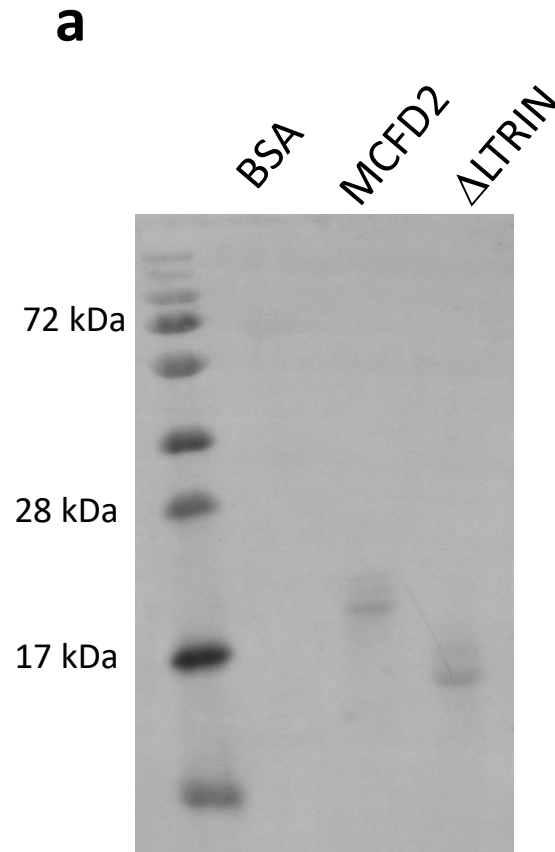

**Supplementary Figure S2:** The EF-hand motif of  $\Delta$ LTRIN a)  $\text{Ca}^{2+}$  binding ability of  $\Delta$ LTRIN is visualised using ruthenium red staining. b) Gel mobility shift assay of  $\Delta$ LTRIN shows that limited structural changes is induced upon bind with  $\text{Ca}^{2+}$ . c)  $\Delta$ LTRIN shows different binding affinity towards different divalent ions. d) The presence of  $\text{Zn}^{2+}$  causes protein precipitation, resulting in a negative outcome.

**b**

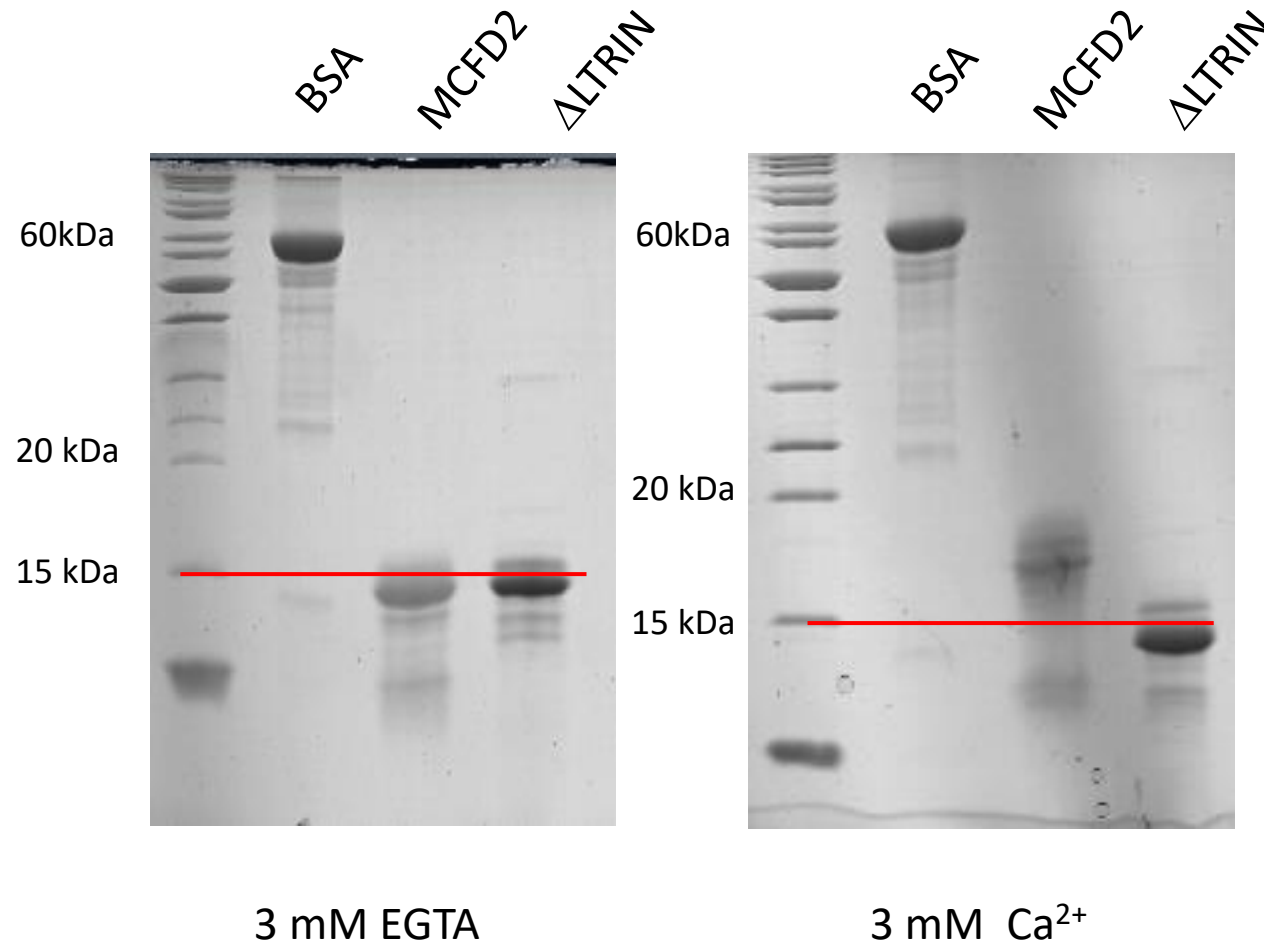

**Supplementary Figure S2:** The EF-hand motif of  $\Delta$ LTRIN a) Ca<sup>2+</sup> binding ability of  $\Delta$ LTRIN is visualised using ruthenium red staining. b) Gel mobility shift assay of  $\Delta$ LTRIN shows that limited structural changes is induced upon bind with Ca<sup>2+</sup>. c)  $\Delta$ LTRIN shows different binding affinity towards different divalent ions. d) The presence of Zn<sup>2+</sup> causes protein precipitation, resulting in a negative outcome.

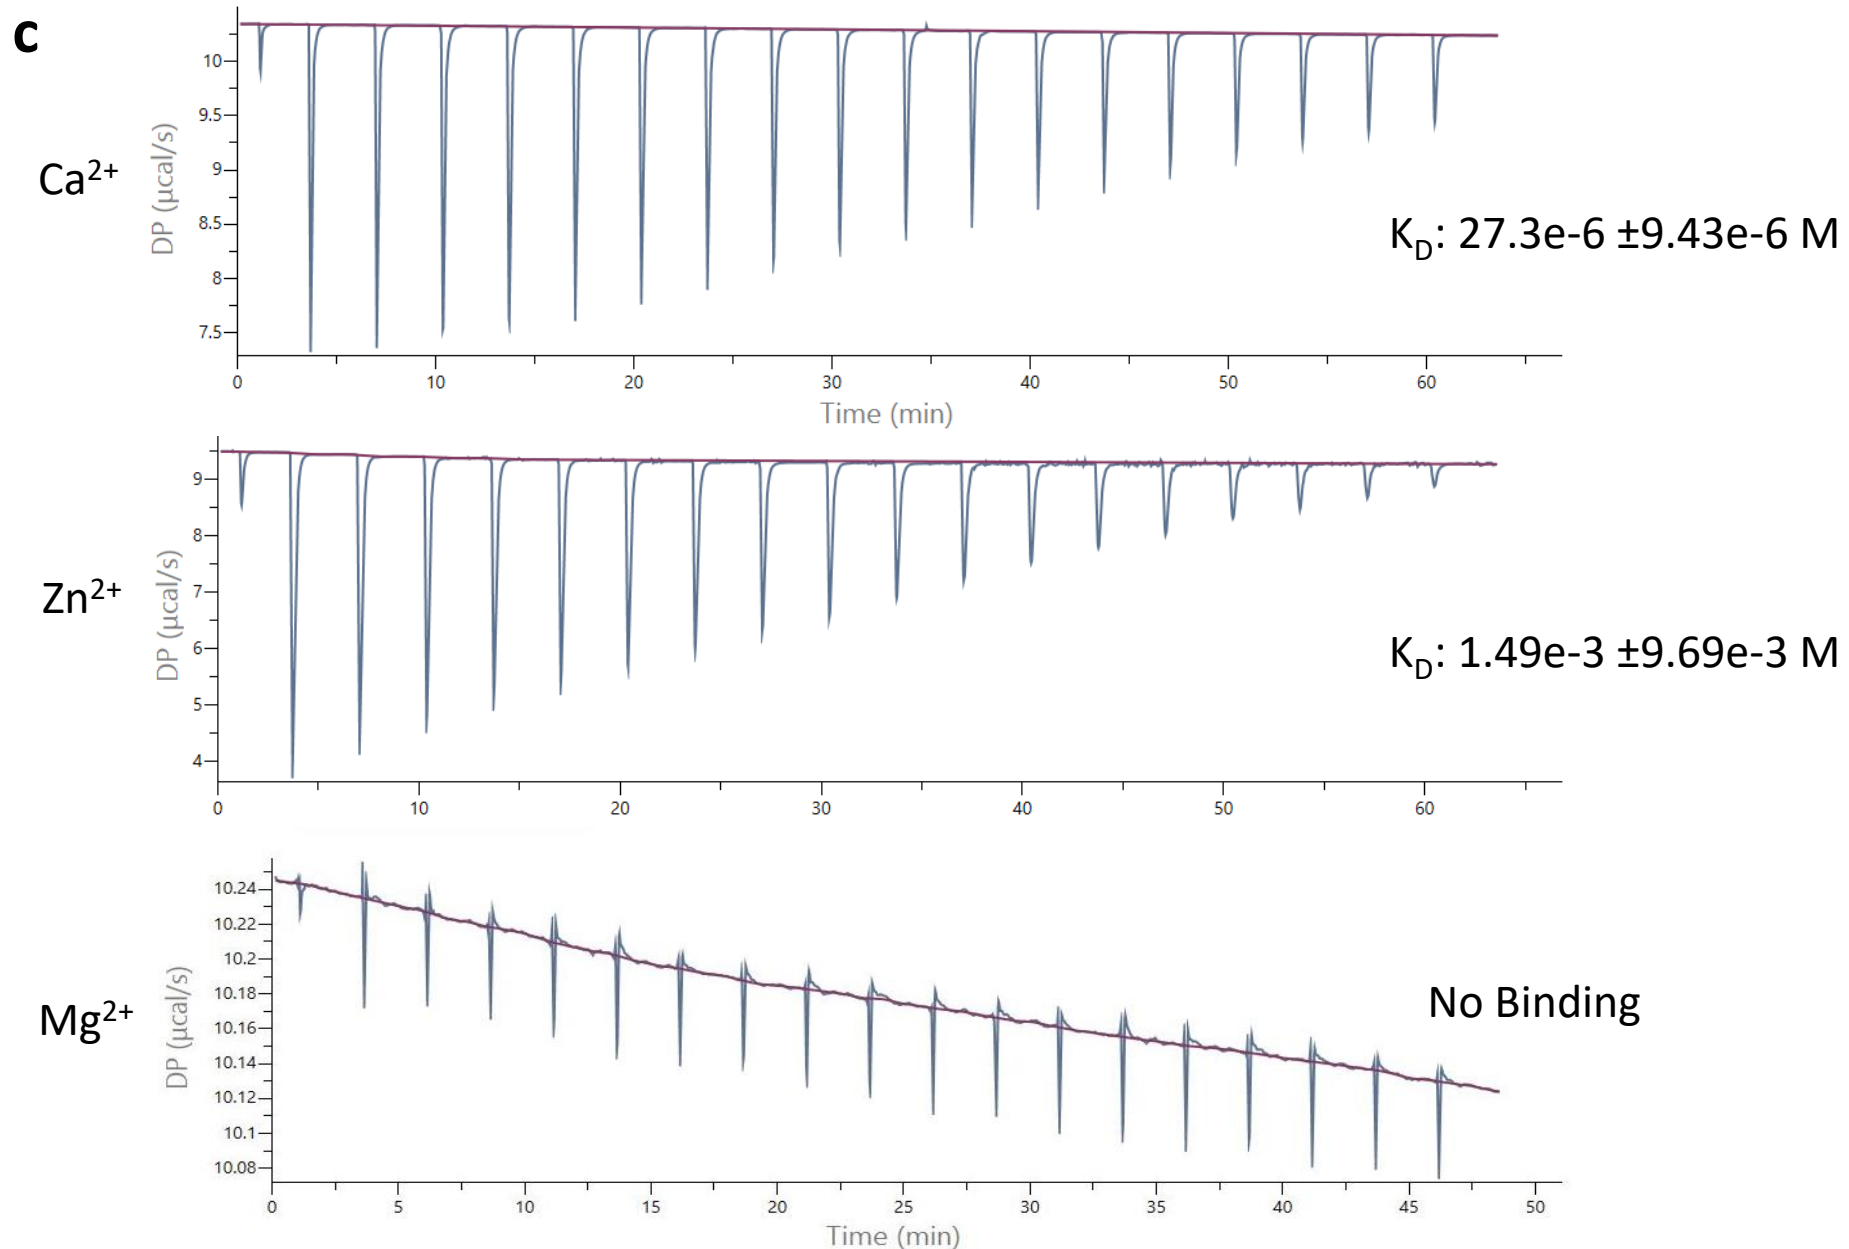

**Supplementary Figure S2:** The EF-hand motif of  $\Delta\text{LTRIN}$  a)  $\text{Ca}^{2+}$  binding ability of  $\Delta\text{LTRIN}$  is visualised using ruthenium red staining. b) Gel mobility shift assay of  $\Delta\text{LTRIN}$  shows that limited structural changes is induced upon bind with  $\text{Ca}^{2+}$ . c)  $\Delta\text{LTRIN}$  shows different binding affinity towards different divalent ions. d) The presence of  $\text{Zn}^{2+}$  causes protein precipitation, resulting in a negative outcome.

d

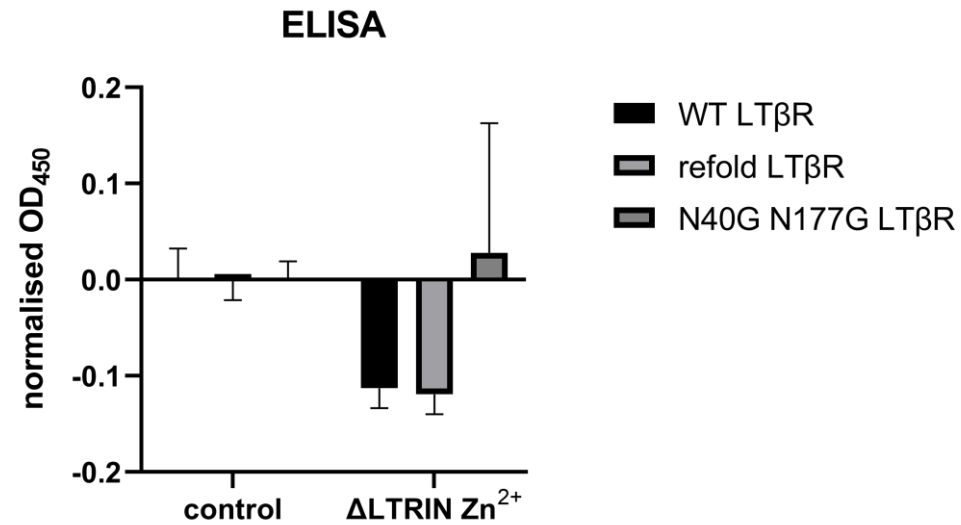

**Supplementary Figure S2:** The EF-hand motif of  $\Delta$ LTRIN a)  $\text{Ca}^{2+}$  binding ability of  $\Delta$ LTRIN is visualised using ruthenium red staining. b) Gel mobility shift assay of  $\Delta$ LTRIN shows that limited structural changes is induced upon bind with  $\text{Ca}^{2+}$ . c)  $\Delta$ LTRIN shows different binding affinity towards different divalent ions. d) The presence of  $\text{Zn}^{2+}$  causes protein precipitation, resulting in a negative outcome.

|           | H(r)  | H(d)  | S(r)  | S(d)  | Turn  | Unrd  |
|-----------|-------|-------|-------|-------|-------|-------|
| SELCON3   | 0.214 | 0.143 | 0.044 | 0.070 | 0.245 | 0.323 |
| CONTINLL  | 0.264 | 0.462 | 0.00  | 0.053 | 0.221 | 0.00  |
| CDSSTR    | 0.300 | 0.257 | 0.059 | 0.094 | 0.151 | 0.145 |
| AlphaFold | 0.586 |       | 0.00  |       | 0.414 |       |

**Supplementary Table S1:** The CD spectra of  $\Delta$ LTRIN in the presence of 2mM CaCl<sub>2</sub> is employed to assess its secondary structure content through three different methods (SELCON3, CONTINLL, and CDSSTR). The proportion of alpha-helix and loop structures in  $\Delta$ LTRIN as anticipated by AlphaFold was also quantified. H(r): regular alpha helices; H(d): distorted alpha helices; S(r): regular beta-sheets; S(d): distorted beta-sheets; Turn: beta-turn; Unrd: unordered structure.
